# Supplementary material for: Rumen and Cecum Microbiomes in Reindeer (Rangifer tarandus tarandus) Are Changed in Response to a Lichen Diet and May Affect Enteric Methane Emissions
Source: PubMed Central journal article supplement (PMC4861291; doi:10.1371/journal.pone.0155213), 2016-05-09

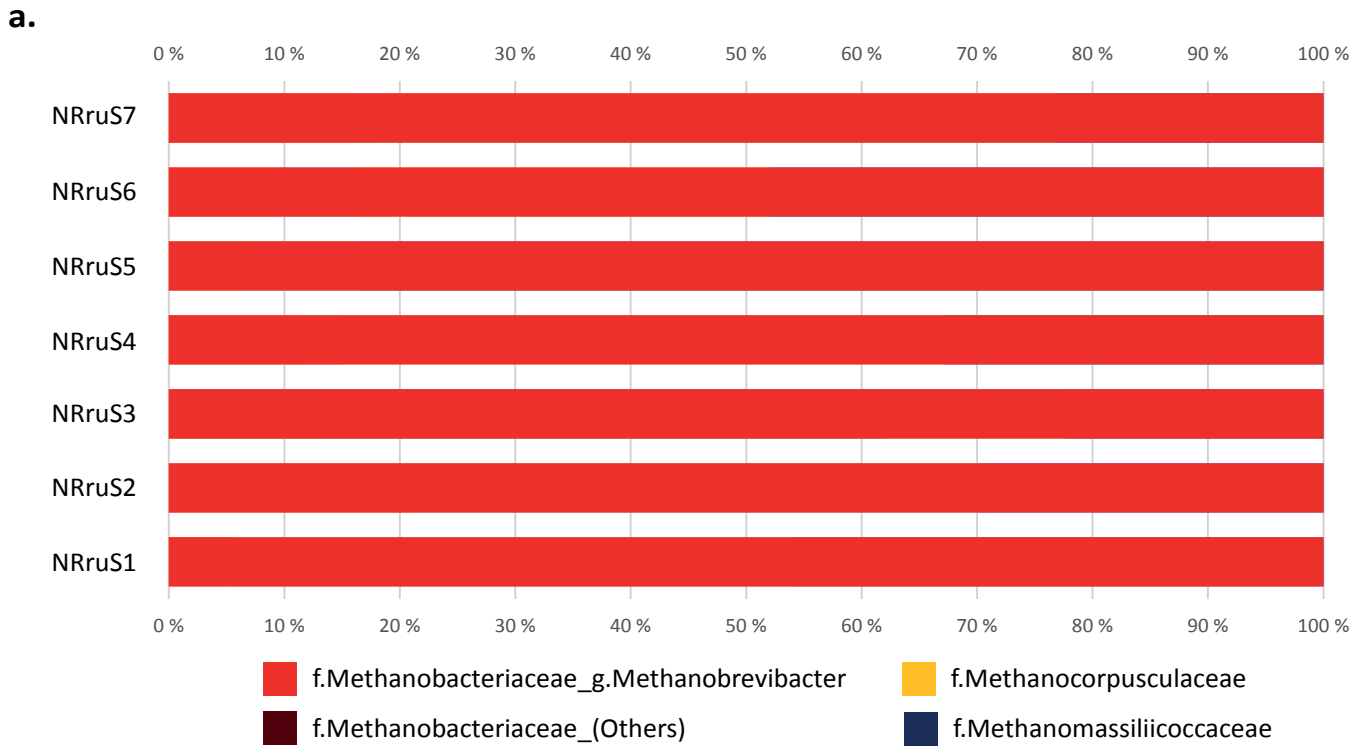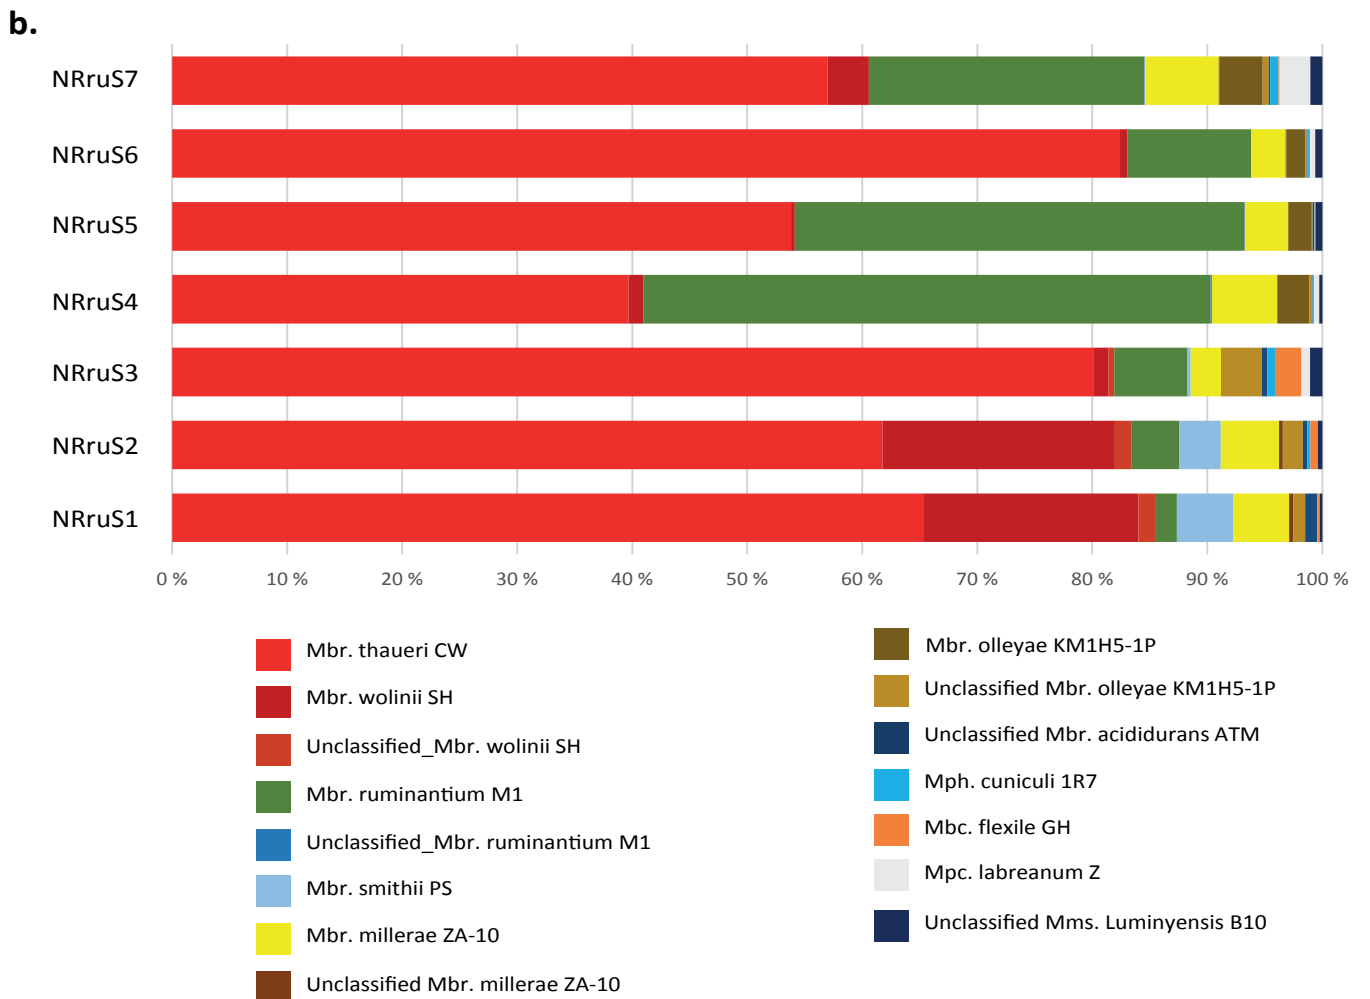

Supplement: pone.0155213.s006.pdf [file pone.0155213.s006.pdf]
